# Supplementary material
Source: PubMed Central journal article supplement (PMC7457321)

## Supplementary Figure

3D

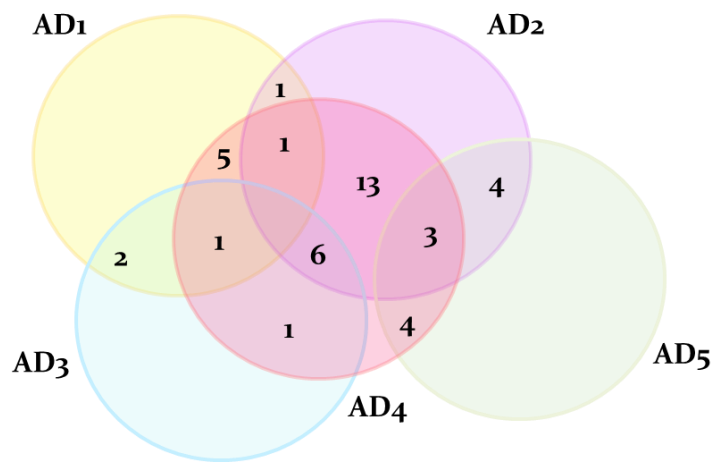

SF

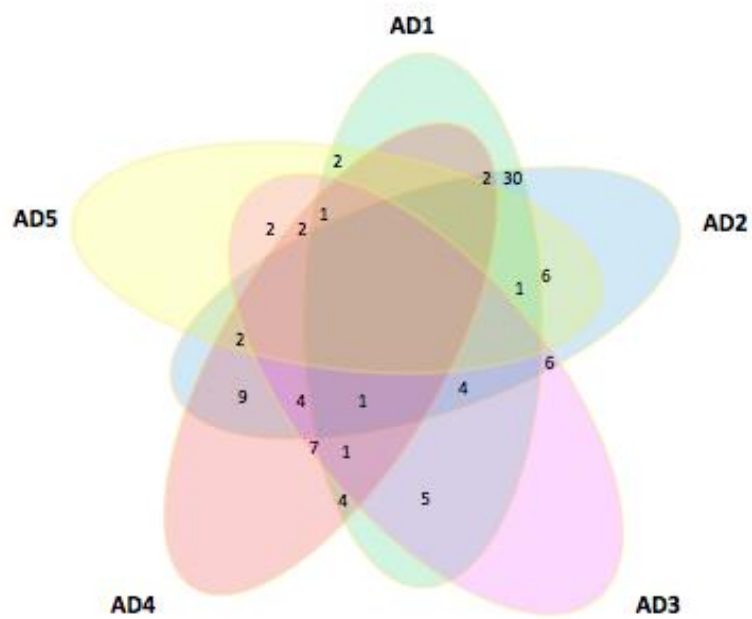

IF

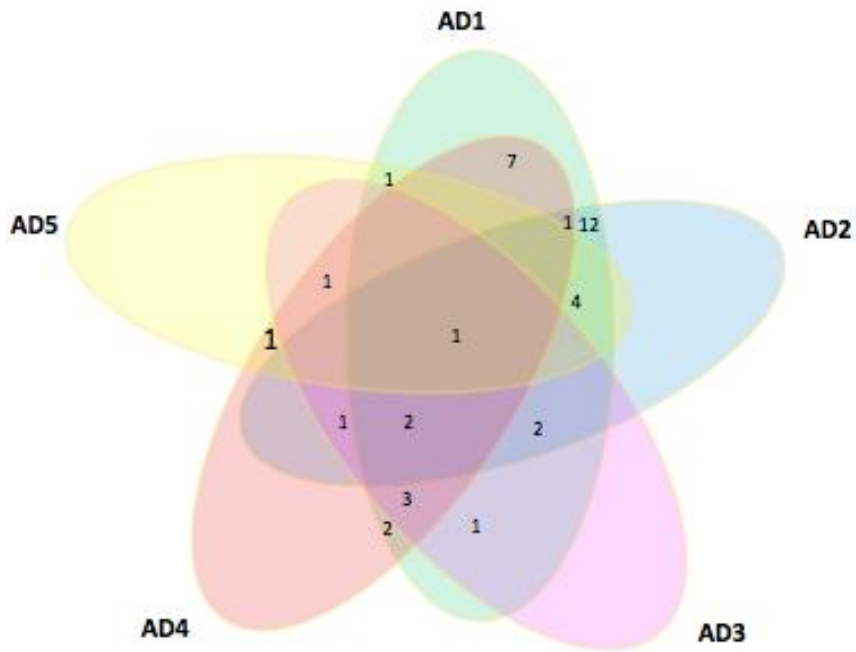

CRLM

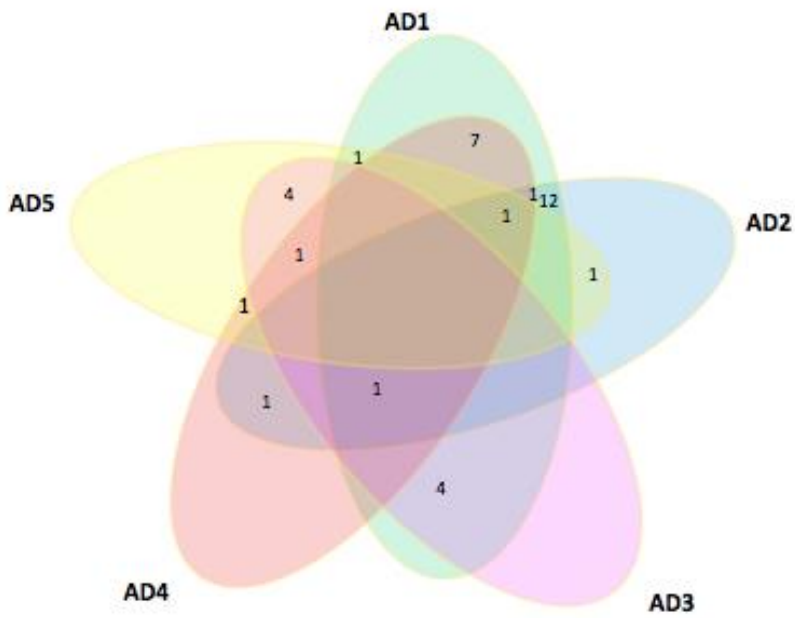

Supplement: NIHMS1057862-supplement-Supplementary_Figure_Chen.pdf [file NIHMS1057862-supplement-Supplementary_Figure_Chen.pdf]
